# Supplementary material for: Machine Learning Integration in Cryptocurrency Trading: A Systematic Review of Fintech Implications
Source: Research Square preprint supplement (doi:10.21203/rs.3.rs-7411123/v1), 2025-10-27
Supplement: Supplementary file 1 [file 0862e98c8c105ebf57fa41ef.docx]

**Appendix A**

**Table 1**: Summary Table of Reviewed Studies on ML in Cryptocurrency Trading

| **Study** | **Predictive Accuracy** | **Trading Performance** | **Risk Management Effectiveness** | **Algorithmic Efficiency** | **Fintech Integration Impact** |
| --- | --- | --- | --- | --- | --- |
| (Alaminos et al., 2024) | EGARCH integrated with genetic algorithms and neural networks | Adaptive genetic algorithm and quantum neural networks excel | EGARCH enhances risk prediction for emerging cryptocurrencies | Novel integration improves predictive accuracy | Provides insights for risk reduction and regulatory guidance |
| (Alessandretti et al., 2018) | ML algorithms anticipate cryptocurrency prices for abnormal profits | Simple ML strategies outperform standard benchmarks | Portfolio optimization based on geometric mean and Sharpe ratio | Parameter tuning enhances predictive accuracy | Supports short-term market evolution anticipation |
| (Alibašić, 2023) | Ethical framework for AI/ML in cryptocurrency trading via consequentialism | Emphasizes balancing AI benefits with market integrity and investor protection | Highlights need for regulation to prevent misuse and unfair advantage | Discusses ethical implications and regulatory compliance | Provides foundational ethical guidance for fintech AI adoption |
| (Amirzadeh et al., 2022) | Survey of AI applications in cryptocurrency markets | Reviews supervised and reinforcement learning for price prediction | Identifies research gaps and challenges in AI model deployment | Highlights early-stage development and scalability issues | Guides future AI research directions in fintech |
| (Amirzadeh et al., 2023) | Reinforcement learning enhanced by causal analysis and Bayesian networks | Outperforms buy-and-hold with notable ROI on altcoins | Conservative position sizing for risk management | Causal feature engineering improves decision-making | Emphasizes risk control and decision support in fintech |
| (Asgari & Khasteh, 2021) | Deep reinforcement learning with PPO, SAC, GAIL for strategy design | Highest gain of 48.5% over 66 days with risk-adjusted tuning | Hyperparameter tuning adjusts risk in generated strategies | Gym environment facilitates algorithm testing | Demonstrates reinforcement learning potential in fintech |
| (Avramelou et al., 2023) | Fine-grained sentiment dataset for deep reinforcement learning | Sentiment-aware DRL improves trading performance | Multi-modal features enhance risk-adjusted returns | Dataset supports minute-level trading decisions | Advances transparency and data-driven fintech strategies |
| (Belcastro et al., 2023) | Combines social media sentiment and market data with deep learning | Achieved average gain of 194% without fees in trading algorithm | Sentiment correlation aids in risk-aware trading decisions | Integrates text analytics and statistical methods | Demonstrates fintech innovation through social data integration |
| (Bellocca et al., 2022) | ML models leverage momentum effect for cryptocurrency trading | Predict short-term volatility reducing false signals and increasing ROI | Momentum detection aids in risk reduction | ML models outperform rule-based momentum strategies | Enhances trading signal accuracy in volatile markets |
| (Betancourt & Chen, 2021) | Self-attention networks with actor-critic DRL for trading | Higher daily profits and advantages over baseline methods | Considers transaction fees for realistic risk assessment | Attention mechanism processes long sequences efficiently | Improves decision-making transparency in fintech |
| (Bouteska et al., 2024) | Comparative analysis of ensemble and deep learning forecasting | GRU, SRNN, and LightGBM outperform benchmarks in price prediction | Models guide investment decisions under volatility | Ensemble methods balance accuracy and computational load | Supports practical trading applications in fintech |
| (Bu & Cho, 2018) | Deep Boltzmann Machine with double Q-network for trading | Achieved 2,686% profit outperforming conventional models | Robust during significant market downturns | Unsupervised pre-training enhances Q-function reliability | Improves reliability of reinforcement learning in fintech |
| (Chen, 2022) | ML-assisted pairs trading combining stocks and cryptocurrencies | Outperforms state-of-the-art methods in prediction and returns | Pairs trading hedges risk amid market uncertainty | ML models improve asset pair selection and strategy | Integrates cross-asset strategies in fintech |
| (Felizardo et al., 2022) | Supervised learning vs reinforcement learning for asset trading | ResNet-LSTM actor outperforms classical reinforcement learning methods | Supervised learning achieves better overall trading performance | Deep learning feature extraction improves efficiency | Suggests supervised learning advantages in fintech trading |
| (Fischer et al., 2019) | Random forest-based statistical arbitrage in cryptocurrency markets | Statistically significant returns after transaction costs | Strategy exploits short-term price movements for risk control | High-frequency trading with large trade volumes | Challenges market efficiency assumptions in fintech |
| (Hafid et al., 2024) | Classification models with enhanced technical indicators | Buy/sell signal accuracy over 92% for Bitcoin | Technical indicators aid in risk reduction | Efficient classification model for trend prediction | Supports informed decision-making, limited fintech integration |
| (Hou, 2025) | AI robots for virtual currency secondary market trading | AI improves decision support, execution speed, and risk assessment | AI robots enhance market response and investment returns | Real-time analysis and automatic execution improve efficiency | Demonstrates practical AI applications in fintech trading |
| (Huang, 2024) | Comparative accuracy of linear regression, decision trees, neural networks | Dynamic portfolio optimization outperforms traditional methods | Integrated VaR and Sharpe Ratio for risk assessment | Efficient backtesting and cross-validation framework | Highlights ML’s potential to revolutionize investment strategies |
| (Jabbar & Jalil, 2024) | Evaluation of 41 ML models including Random Forest and SGD | Random Forest and SGD models excel in profit and risk management | Backtesting confirms robustness under volatile conditions | Extensive model comparison with practical applicability | Addresses practical trading strategy development, less on fintech impact |
| (Kang et al., 2024) | Advantage Actor-Critic reinforcement learning for asset allocation | Effective balance of risk and return in volatile markets | Reward function tuning for risk management | Reinforcement learning suitable for 24/7 markets | Addresses portfolio management and risk in fintech context |
| (Koker & Koutmos, 2020) | Reinforcement ML for active trading on major cryptocurrencies | Model yields enhanced risk-adjusted returns over buy-and-hold | Reduces downside risk accounting for transaction costs | Calibrated model adapts to real-world portfolio management | Demonstrates practical reinforcement learning in fintech |
| (Kouloumpris & Vlahavas, 2023) | Deep reinforcement learning combined with rule-based safety mechanisms | Maximizes profit and minimizes risk in cryptocurrency trading | Rule-based constraints reduce trading noise and risk | Hybrid approach balances exploration and exploitation | Incorporates risk-aware mechanisms, limited regulatory focus |
| (Kumari et al., 2024) | ML impacts on pricing, fraud detection, risk mitigation, and compliance | ML enhances pricing strategies and fraud detection | ML assists in risk management and regulatory compliance | Improves data processing efficiency | Discusses broad fintech implications including regulation |
| (Kumlungmak, 2024) | Multi-agent proximal policy optimization for cryptocurrency trading | Superior cumulative returns, especially in bearish markets | Progressive penalty mechanism mitigates consecutive losses | Collaborative multi-agent scheme enhances scalability | Advances multi-agent reinforcement learning in fintech |
| (Lam & Makarov, 2023) | Rainbow DQN with CNN for pair trading in cryptocurrencies | Outperforms RSI and correlation strategies, but not profitable post fees | CNN extracts features from candlestick images for decisions | Computationally intensive with limited profitability | Highlights challenges in high-frequency fintech trading |
| (Leung et al., 2023) | Social media sentiment analysis for trading signal generation | Reliable short- and long-term trading signals from tweets | Sentiment scores incorporated for risk-informed decisions | Real-time price visualization supports efficiency | Enhances financial literacy and fintech accessibility |
| (Li et al., 2024) | ML analysis of cryptocurrency return prediction with SHAP | Tree models outperform neural networks in predictability | Portfolios based on neural networks achieve the highest cumulative returns | SHAP method identifies key predictive factors | Provides interpretability and practical guidance in fintech |
| (Lu et al., 2024) | High accuracy via genetic algorithm and neural network hybrid | Achieved 19.33% and 7.13% profit outperforming benchmarks | Robust across bullish and bearish phases | Genetic algorithm optimizes model parameters efficiently | Limited discussion on regulatory or ethical aspects |
| (Lua et al., 2025) | Random Forest, LSTM, Bi-LSTM models with smart contract integration | LSTM model achieved 488.74% ROI outperforming benchmarks | Real-time risk assessment via smart contracts | Integration with blockchain enhances efficiency | Strong fintech integration with transparency and security focus |
| (Lucarelli & Borrotti, 2019) | Deep reinforcement learning with Double and Dueling DQN for Bitcoin | Sharpe ratio reward function yields most profitable trading | Compares reward functions for risk-adjusted performance | Deep Q-learning networks suitable for long-term trading | Advances reward design in fintech trading algorithms |
| (Lucarelli et al., 2020) | Deep Q-learning framework for cryptocurrency portfolio management | Promising approach for dynamic portfolio optimization | Balances return maximization and risk minimization | Local and global agents improve computational efficiency | Advances reinforcement learning in fintech portfolio management |
| (Majidi et al., 2022) | Twin-Delayed DDPG for continuous action space trading | Continuous action space improves return and Sharpe ratio | Algorithm adapts position size for risk management | Suitable for real-time stock and cryptocurrency markets | Enhances algorithmic trading flexibility in fintech |
| (Mandych et al., 2023) | AI integration in blockchain for trend prediction and fraud detection | AI optimizes trading strategies and reduces costs | AI aids in risk management and fraud prevention | Emphasizes efficiency and security improvements | Advocates responsible AI adoption and regulatory compliance |
| (Mikhaiylova & Sabirova, 2024) | Classification models for buy/sell signals using technical analysis | Demonstrated effectiveness of ML in modern trading strategies | Risk control via moving averages and classification | Moderate computational requirements | Focus on trading strategy development, minimal fintech context |
| (Okasová & Košťál, 2024) | ML models predict arbitrage opportunities in cryptocurrency exchanges | Random Forest effective in predicting arbitrage during low volatility | Mixed profitability due to market timing and noise | Real-time prediction supports algorithmic trading bots | Highlights operational challenges in fintech arbitrage |
| (Otabek & Choi, 2024) | Multi-level deep Q-network with sentiment analysis and novel reward | 29.93% investment value increase with high Sharpe Ratio | Reward function balances profit and risk | Deep reinforcement learning with preprocessing pipeline | Advances in reinforcement learning for trading robustness |
| (Pang et al., 2019) | ML models integrating social sentiment for Bitcoin price prediction | Sentiment data models capture non-linear relationships better than technical indicators | Neural networks provide robust and accurate price forecasts | Incorporates multi-source data for improved efficiency | Advances sentiment analysis in fintech trading |
| (Park & Seo, 2022) | Deep learning model recommending buy/sell/wait actions | 13%-21% improvement over existing price prediction methods | Action recommendations support risk-aware trading | Deep learning facilitates decision-making efficiency | Focus on client decision support within fintech context |
| (Pasupuleti, 2024) | AI integration with blockchain for security and innovative trading | AI-driven fintech services reshape customer experience | AI supports regulatory compliance and risk management | AI streamlines processes and enhances transparency | Comprehensive fintech impact including ethical considerations |
| (Peng et al., 2022) | Proximal policy optimization in automated trading system | Outperforms buy-and-hold and similar models in returns | Reduces emotional bias and improves risk-adjusted returns | Stable and robust automated trading implementation | Emphasizes automation and behavioral finance in fintech |
| (Qing et al., 2022a) | Deep learning-based trading strategies for cryptocurrency profitability | Combines stock prediction models with deep learning for returns | Trading strategies improve profitability under volatile conditions | Deep learning models enhance prediction robustness | Focus on profitability enhancement in fintech context |
| (Qing et al., 2022b) | AutoEncoder-based multi-factor deep learning for portfolio construction | Outperforms single-factor models in cumulative returns and Sharpe Ratio | Multi-factor model improves risk-adjusted portfolio performance | Handles high-dimensional data efficiently | Advances portfolio optimization in fintech |
| (Ramkumar, 2021) | ARIMA, CNN, LSTM for multivariate cryptocurrency portfolio prediction | Cointegrated pair portfolios outperform with maximized annualized returns | Portfolio construction incorporates risk parity and Kelly criterion | Combines statistical and deep learning methods | Enhances portfolio management in fintech |
| (Sanju et al., 2023) | Transformer and LSTM models with social media sentiment for trading | Improved prediction precision via temporal and sentiment features | Automated systems enable personalized and adaptive trading | Integration of advanced NLP enhances fintech capabilities | Highlights technology-methodology synergy in fintech |
| (Sattarov et al., 2020) | Deep reinforcement learning for trading action recommendation | Achieved 14.4% to 74% net profits on various cryptocurrencies | DRL observes historical data for real-time action decisions | Application tested on multiple cryptocurrencies | Demonstrates DRL effectiveness in fintech trading |
| (Sebastião & Godinho, 2021) | ML predictability and profitability under changing market conditions | Ensemble models achieve positive returns and Sharpe ratios in bear markets | Models robust to market regime changes for risk control | Extensive validation with rolling-window forecasts | Supports adaptive trading strategies in fintech |
| (Singh et al., 2022) | LSTM-based high-frequency algorithmic trading for Bitcoin and Ethereum | Positive backtesting returns on hourly and minute data | Trading algorithm uses network forecasts for risk-aware decisions | Fuzzy intervals quantify algorithmic returns | Demonstrates LSTM efficacy in high-frequency fintech trading |
| (Ślepaczuk & Zenkova, 2019) | SVM-based algorithmic trading strategy for cryptocurrency portfolios | SVM portfolio outperforms benchmarks on risk-weighted gain metrics | Sensitivity analysis on SVM parameters for risk control | Non-linear SVM enhances classification accuracy | Addresses robustness and risk in fintech trading |
| (Song, 2025) | Extreme Gradient Boosting and LSTM for Bitcoin and other cryptocurrencies | Improved portfolio returns via price prediction and optimization | Monte Carlo simulation for risk-adjusted portfolio allocation | Computationally intensive but scalable for multiple assets | Discusses portfolio optimization within fintech frameworks |
| (Srivastava & Sikroria, 2024) | AI models including ML, DL, NLP for predictive accuracy and market efficiency | AI improves trade execution and reduces transaction costs | Addresses risks of overfitting and data biases | Enhances market liquidity and latency reduction | Highlights ethical and regulatory challenges in fintech |
| (Sruthi & Shahithabanu, 2024) | Diverse AI models including regression, neural networks, reinforcement learning | AI optimizes trading strategies and market trend analysis | Sentiment and volatility prediction improve risk control | Integration of NLP for sentiment analysis | Highlights AI’s role in decision-making and risk mitigation |
| (Su, 2024) | Adaptive LSTM with swarm optimization for parameter tuning | Balanced profit and risk with real-time adaptive trading | Self-adaptive algorithm controls risk dynamically | Online self-adaptive trading algorithm suitable for real-time | Focus on automated trading adaptability, less on compliance |
| (Tanwar & Raboaca, 2022) | Stochastic neural networks combined with mean reversion strategies | Trading algorithms outperform buy-and-hold in stability and returns | Incorporates social sentiment for risk-aware trading | Hybrid models capture market volatility effectively | Advances neural network applications in fintech trading |
| (Toleti et al., 2024) | Fusion of LSTM, Bi-LSTM, ARIMA, Prophet, and HMM with 98% R2 score | Robust BTC trading strategy with high accuracy and Sharpe Ratio | HMM enhances risk-aware forecasting | Complex hybrid model with moderate efficiency | Limited explicit discussion on regulatory or ethical issues |
| (Viéitez et al., 2024) | GRU, LSTM, and SVM models with sentiment analysis for Ethereum | Profit factor up to 5.16 with knowledge-based strategies | Sentiment analysis showed limited risk mitigation impact | Moderate computational demand with deep learning models | Emphasizes knowledge-based investment, limited fintech integration |
| (Żbikowski, 2016) | Comparison of technical analysis and ML for Bitcoin trading | ML models show promising performance over simple technical methods | Early investigation into ML for Bitcoin trading strategies | Computationally feasible with room for improvement | Pioneering work in ML application to cryptocurrency trading |
| (Zhao et al., 2024) | Deep reinforcement learning with LSTM for trend forecasting and risk | High practical value in price trend prediction and risk management | Combines technical indicators and sentiment for risk control | Integrated DRL and ML models optimize trading | Suggests future improvements for fintech adaptability |

***Source:*** *Author’s own editing based on reviewed articles*
